# Supplementary material for: Probiotic Properties of Lactic Acid Bacteria with High Conjugated Linoleic Acid Converting Activity Isolated from Jeot-Gal, High-Salt Fermented Seafood
Source: MDPI journal article supplement (doi:10.3390/microorganisms9112247), 2021-10-28
Supplement: s1 [file s1]

## **Supplementary Materials**

# **Probiotic Properties of Lactic Acid Bacteria with High Conjugated Linoleic Acid Converting Activity Isolated from *Jeot-* *Gal*, High-Salt Fermented Seafood**

**Song et al.**

### **Contents**

#### **Supplementary Table S1.**

Primer sequences of cytokines used in qRT-PCR analysis.

#### **Supplementary Figure S1.**

MRS plate agar medium containing 0.2% linoleic acid. (a) large and well growth colony.

#### **Supplementary Figure S2.**

UV spectral scan of hexane extracts. (a) fatty acids extracted from the fermentation culture of JBCC105611, (b) fatty acids extracted from the fermentation culture of JBCC105657.

#### **Supplementary Figure S3.**

Phylogenetic tree based on 16S rDNA analysis of LAB isolated from *Jeot-gals*.

#### **Supplementary Figure S4.**

Antibacterial activity of some CLA-producing LAB against pathogenic bacteria. (a) *Staphylococcus aureus* KCTC 1916, (b) *Staphylococcus epidermidis* KCTC 1917, (c) *Staphylococcus xylosus* KACC 13239, (d) *Pseudomonas aeruginosa* KACC 10186, (e) *P. putida* KACC 10266, (f) *Bacillus cereus* KACC 10097, (g) *Bacillus subtilis subsp. spizizenii* KACC 14741, (h) *Bacillus vallismortis* KACC 12149, (i) *Escherichia coli* KACC 13821, (j) *Propionibacteria acnes* KCTC 3314.

### **Supplementary Figure S5.**

The effects of selected *lactobacillus* strains on RAW 264.7 cell proliferation by using the MTT colorimetric assay.

## Supplemental Table S1

**Supplementary Table S1.** Primer sequences of cytokines used in qRT-PCR analysis.

| Gene          |         | Primer sequences                  | Tm   |
|---------------|---------|-----------------------------------|------|
| IL-1 $\beta$  | Forward | 5'-TGACGGACCCCAAAAGAT-3'          | 52.1 |
|               | Reverse | 5'-GTGATACTGCCTGCCTGAAG-3'        | 52   |
| IL-6          | Forward | 5'-CCGGAGAGGAGACTTCACAGAG-3'      | 56.6 |
|               | Reverse | 5'-TCATTTCCACGATTTCCCAGAG-3'      | 57.5 |
| TNF- $\alpha$ | Forward | 5'-AGGCACTCCCCCAAAAGATG-3'        | 57.4 |
|               | Reverse | 5'-CACCCCGAAGTTCAGTAGACAGA-3'     | 56.9 |
| IL-10         | Forward | 5'-GCTGGACAACATACTGCTAACCGACTC-3' | 62   |
|               | Reverse | 5'-TCCTTGATTTCTGGGCCATGCTTCTCT-3' | 66.4 |
| IL-12         | Forward | 5'-CGTGCTCATGGCTGGTGCAAAG-3'      | 64.4 |
|               | Reverse | 5'-CTTCATCTGCAAGTTCTTGGGC-3'      | 57.5 |
| TGF- $\beta$  | Forward | 5'-GCTACCATGCCAACTTCTGTCTG-3'     | 57.4 |
|               | Reverse | 5'-GAAGCGCCCGGGTTGTGTTGGTTGTAG-3' | 70.7 |
| GAPDH*        | Forward | 5'-CATGGCCTTCCGTGTTCCCTAC-3'      | 57.9 |
|               | Reverse | 5'-TCAGTGGGCCCTCAGATGC-3'         | 58   |

\*GAPDH, Glyceraldehyde-3-phosphate dehydrogenase.

## Supplemental Figure S1

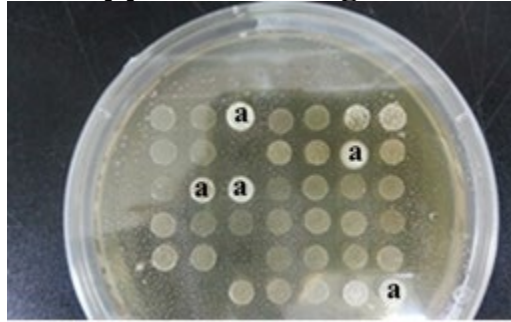

**Supplementary Figure S1.** MRS plate agar medium containing 0.2% linoleic acid (a) large and well colony.

## Supplemental Figure S2

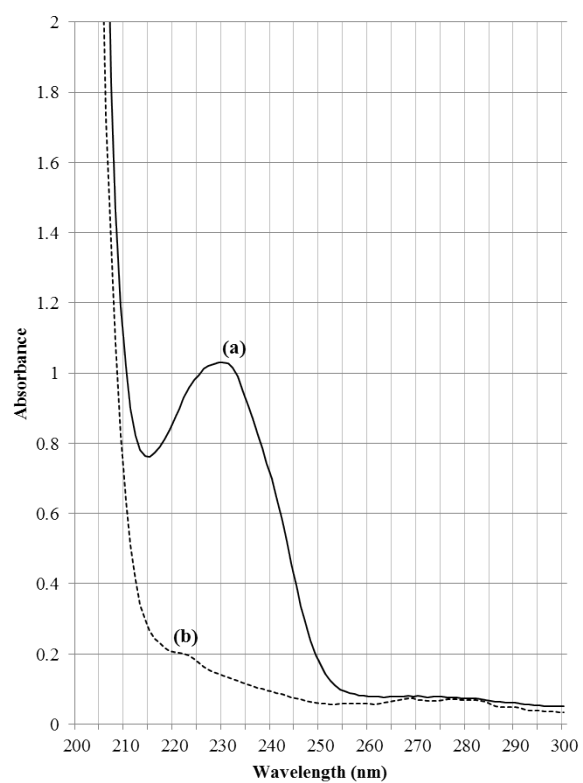

**Supplementary Figure S2.** UV spectral scan of hexane extracts. (a) fatty acids extracted from the fermentation culture of JBCC105611, (b) fatty acids extracted from the fermentation culture of JBCC105657.

## Supplemental Figure S3

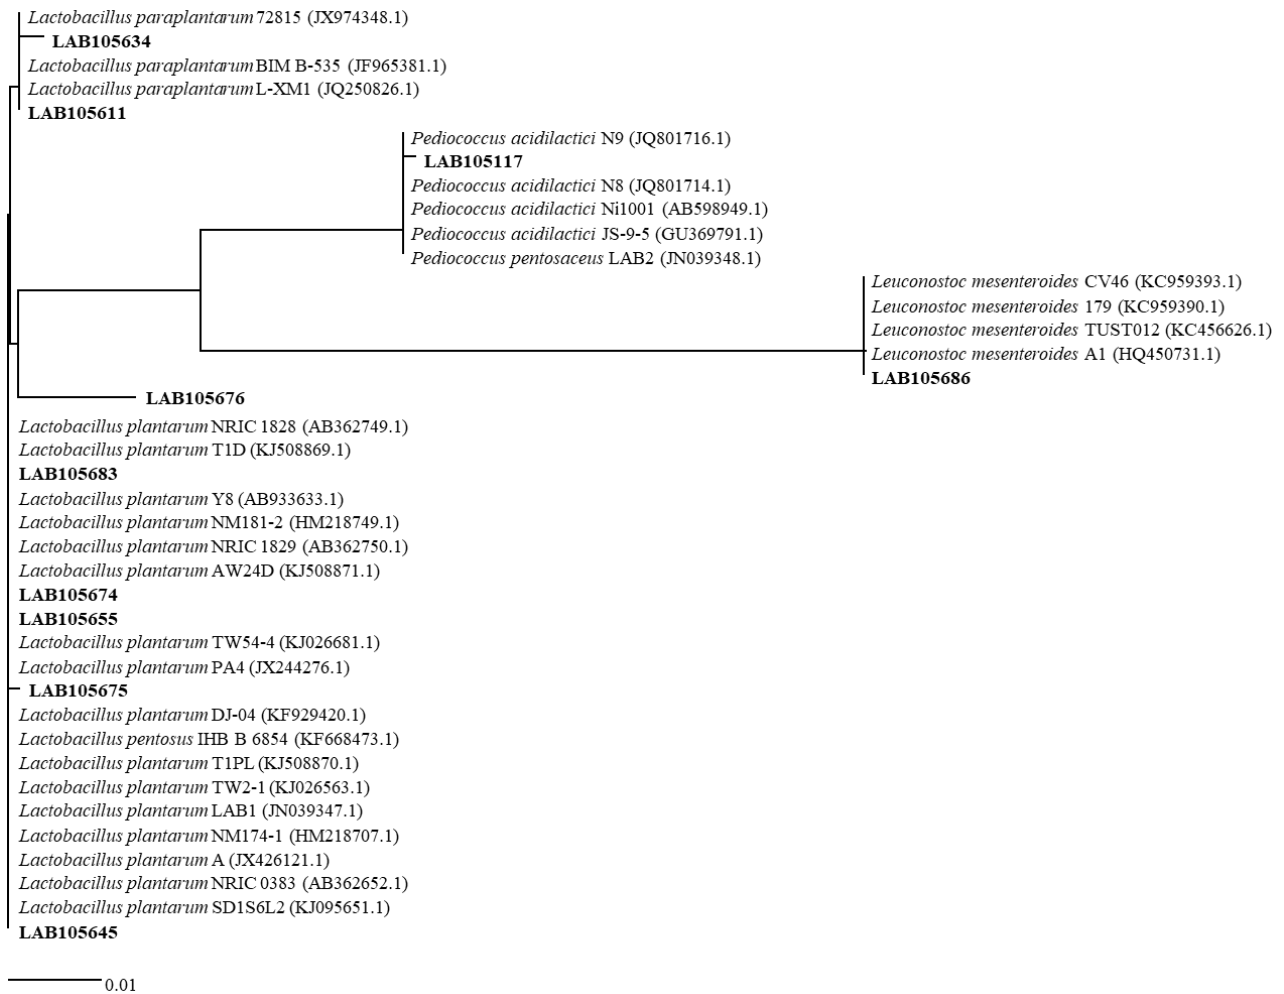

**Supplementary Figure S3.** Phylogenetic tree based on 16S rDNA analysis of LAB isolated from *Jeot-gals*.

## Supplemental Figure S4

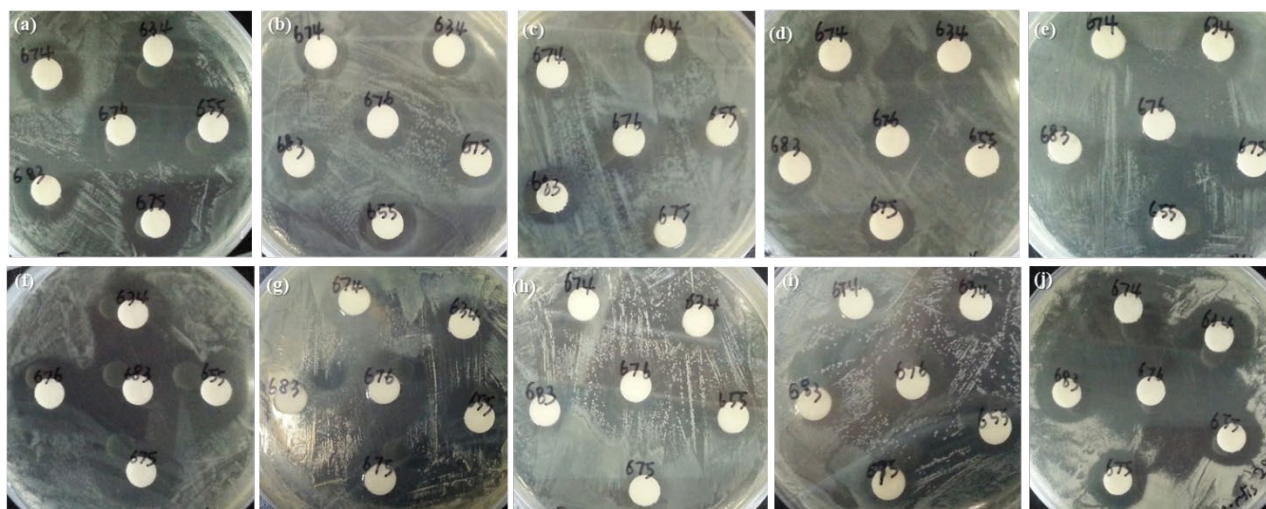

### Supplementary Figure S4.

Antibacterial activity of some CLA-producing LAB against pathogenic bacteria. (a) *Staphylococcus aureus* KCTC 1916, (b) *Staphylococcus epidermidis* KCTC 1917, (c) *Staphylococcus xylosus* KACC 13239, (d) *Pseudomonas aeruginosa* KACC 10186, (e) *P. putida* KACC 10266, (f) *Bacillus cereus* KACC 10097, (g) *Bacillus subtilis subsp. spizizenii* KACC 14741, (h) *Bacillus vallismortis* KACC 12149, (i) *Escherichia coli* KACC 13821, (j) *Propionibacteria acnes* KCTC 3314.

## Supplemental Figure S5

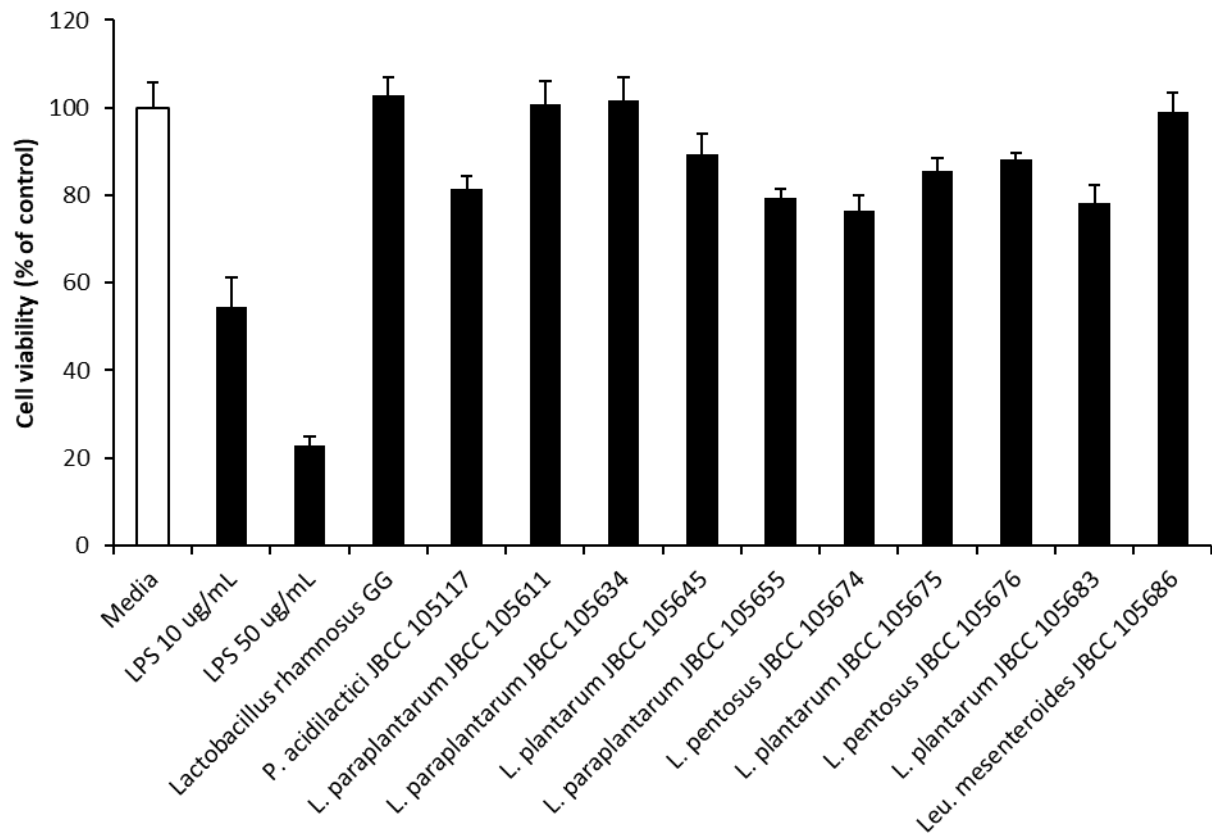

**Supplementary Figure S5.** The effects of selected *Lactobacillus* strains on RAW 264.7 cell proliferation by using the MTT colorimetric assay.
